# Supplementary material for: Combining Essential Oils with Each Other and with Clotrimazole Prevents the Formation of Candida Biofilms and Eradicates Mature Biofilms
Source: MDPI journal article supplement (doi:10.3390/pharmaceutics14091872), 2022-09-05
Supplement: s1 [file s1]

# Supplementary Materials: Combining Essential Oils with Each Other and with Clotrimazole Prevents the Formation of *Candida* Biofilms and Eradicates Mature Biofilms

Rafael Alves da Silva, Nagela Bernadelli Sousa Silva, Carlos Henrique Gomes Martins, Regina Helena Pires, Denise Von Dolinger de Brito Röder and Reginaldo dos Santos Pedroso

**Table S1.** Combinations between OE-OE and OE-clotrimazole in *Candida* species.

| Species                       | Compound "A"           | Compound "B"           | Isolated MIC "A"* | Isolated MIC "B"* | MIC "A" combined** | MIC "B" combined** | FICI   | Result       |
|-------------------------------|------------------------|------------------------|-------------------|-------------------|--------------------|--------------------|--------|--------------|
| <i>C. albicans</i> ATCC 90028 | <i>L. cubeba</i>       | <i>M. alternifolia</i> | 1000              | 4000              | 500                | 2000               | 1      | Additive     |
| <i>C. albicans</i> ATCC 90028 | <i>C. limon</i>        | Clotrimazole           | 2000              | 0,25              | 4000               | 1                  | 6      | Antagonism   |
| <i>C. albicans</i> ATCC 90028 | <i>C. sempervirens</i> | <i>C. limon</i>        | 2000              | 2000              | 4000               | 4000               | 4      | Indifference |
| <i>C. albicans</i> ATCC 90028 | <i>C. sempervirens</i> | <i>L. cubeba</i>       | 2000              | 1000              | 1000               | 1000               | 1,5    | Indifference |
| <i>C. albicans</i> ATCC 90028 | <i>C. sempervirens</i> | <i>M. alternifolia</i> | 2000              | 4000              | 4000               | 4000               | 3      | Indifference |
| <i>C. albicans</i> ATCC 90028 | <i>L. cubeba</i>       | <i>C. limon</i>        | 1000              | 2000              | 2000               | 2000               | 3      | Indifference |
| <i>C. albicans</i> ATCC 90028 | <i>C. limon</i>        | <i>M. alternifolia</i> | 2000              | 4000              | 4000               | 4000               | 3      | Indifference |
| <i>C. albicans</i> ATCC 90028 | <i>C. sempervirens</i> | Clotrimazole           | 2000              | 0,25              | 250                | 0,5                | 2,125  | Indifference |
| <i>C. albicans</i> ATCC 90028 | <i>L. cubeba</i>       | Clotrimazole           | 1000              | 0,25              | 250                | 0,5                | 2,25   | Indifference |
| <i>C. albicans</i> ATCC 90028 | <i>M. alternifolia</i> | Clotrimazole           | 4000              | 0,25              | 250                | 0,063              | 0,3145 | Synergism    |
| <i>C. albicans</i> SV01       | <i>C. sempervirens</i> | <i>L. cubeba</i>       | 4000              | 2000              | 2000               | 1000               | 1      | Additive     |
| <i>C. albicans</i> SV01       | <i>C. sempervirens</i> | <i>M. alternifolia</i> | 4000              | 4000              | 2000               | 1000               | 0,75   | Additive     |
| <i>C. albicans</i> SV01       | <i>C. sempervirens</i> | Clotrimazole           | 4000              | 0,125             | 500                | 0,063              | 0,629  | Additive     |
| <i>C. albicans</i> SV01       | <i>M. alternifolia</i> | Clotrimazole           | 4000              | 0,125             | 250                | 0,063              | 0,5665 | Additive     |

|                              |                        |                        |      |       |      |       |        |              |
|------------------------------|------------------------|------------------------|------|-------|------|-------|--------|--------------|
| <i>C. albicans</i> SV01      | <i>C. sempervirens</i> | <i>C. limon</i>        | 4000 | 4000  | 4000 | 4000  | 2      | Indifference |
| <i>C. albicans</i> SV01      | <i>L. cubeba</i>       | <i>C. limon</i>        | 2000 | 4000  | 2000 | 2000  | 1,5    | Indifference |
| <i>C. albicans</i> SV01      | <i>C. limon</i>        | <i>M. alternifolia</i> | 4000 | 4000  | 4000 | 4000  | 2      | Indifference |
| <i>C. albicans</i> SV01      | <i>C. limon</i>        | Clotrimazole           | 4000 | 0,125 | 4000 | 0,25  | 3      | Indifference |
| <i>C. albicans</i> SV01      | <i>L. cubeba</i>       | Clotrimazole           | 2000 | 0,125 | 2000 | 0,25  | 3      | Indifference |
| <i>C. albicans</i> SV01      | <i>L. cubeba</i>       | <i>M. alternifolia</i> | 2000 | 4000  | 500  | 1000  | 0,5    | Synergism    |
| <i>C. glabrata</i> ATCC 2001 | <i>C. sempervirens</i> | <i>L. cubeba</i>       | 2000 | 2000  | 1000 | 500   | 0,75   | Additive     |
| <i>C. glabrata</i> ATCC 2001 | <i>L. cubeba</i>       | <i>M. alternifolia</i> | 2000 | 4000  | 1000 | 1000  | 0,75   | Additive     |
| <i>C. glabrata</i> ATCC 2001 | <i>C. limon</i>        | <i>M. alternifolia</i> | 4000 | 4000  | 2000 | 2000  | 1      | Additive     |
| <i>C. glabrata</i> ATCC 2001 | <i>C. sempervirens</i> | Clotrimazole           | 2000 | 0,015 | 4000 | 0,06  | 6      | Antagonism   |
| <i>C. glabrata</i> ATCC 2001 | <i>C. limon</i>        | Clotrimazole           | 4000 | 0,015 | 4000 | 0,06  | 5      | Antagonism   |
| <i>C. glabrata</i> ATCC 2001 | <i>M. alternifolia</i> | Clotrimazole           | 4000 | 0,015 | 4000 | 0,06  | 5      | Antagonism   |
| <i>C. glabrata</i> ATCC 2001 | <i>C. sempervirens</i> | <i>C. limon</i>        | 2000 | 4000  | 2000 | 250   | 1,0625 | Indifference |
| <i>C. glabrata</i> ATCC 2001 | <i>C. sempervirens</i> | <i>M. alternifolia</i> | 2000 | 4000  | 2000 | 250   | 1,0625 | Indifference |
| <i>C. glabrata</i> ATCC 2001 | <i>L. cubeba</i>       | Clotrimazole           | 2000 | 0,015 | 2000 | 0,015 | 2      | Indifference |
| <i>C. glabrata</i> ATCC 2001 | <i>L. cubeba</i>       | <i>C. limon</i>        | 2000 | 4000  | 500  | 1000  | 0,5    | Synergism    |
| <i>C. glabrata</i> SV 02     | <i>C. sempervirens</i> | <i>M. alternifolia</i> | 1000 | 4000  | 500  | 1000  | 0,75   | Additive     |
| <i>C. glabrata</i> SV 02     | <i>L. cubeba</i>       | <i>C. limon</i>        | 2000 | 4000  | 500  | 2000  | 0,75   | Additive     |
| <i>C. glabrata</i> SV 02     | <i>C. sempervirens</i> | <i>C. limon</i>        | 1000 | 4000  | 4000 | 4000  | 5      | Antagonism   |
| <i>C. glabrata</i> SV 02     | <i>C. limon</i>        | Clotrimazole           | 4000 | 0,25  | 4000 | 1     | 5      | Antagonism   |
| <i>C. glabrata</i> SV 02     | <i>M. alternifolia</i> | Clotrimazole           | 4000 | 0,25  | 4000 | 1     | 5      | Antagonism   |
| <i>C. glabrata</i> SV 02     | <i>C. sempervirens</i> | <i>L. cubeba</i>       | 1000 | 2000  | 1000 | 1000  | 1,5    | Indifference |
| <i>C. glabrata</i> SV 02     | <i>C. sempervirens</i> | Clotrimazole           | 1000 | 0,25  | 1000 | 0,5   | 3      | Indifference |
| <i>C. glabrata</i> SV 02     | <i>L. cubeba</i>       | Clotrimazole           | 2000 | 0,25  | 2000 | 0,5   | 3      | Indifference |
| <i>C. glabrata</i> SV 02     | <i>L. cubeba</i>       | <i>M. alternifolia</i> | 2000 | 4000  | 250  | 1000  | 0,375  | Synergism    |
| <i>C. glabrata</i> SV 02     | <i>C. limon</i>        | <i>M. alternifolia</i> | 4000 | 4000  | 1000 | 1000  | 0,5    | Synergism    |
| <i>C. krusei</i> ATCC 6258   | <i>C. sempervirens</i> | <i>L. cubeba</i>       | 2000 | 1000  | 500  | 500   | 0,75   | Additive     |
| <i>C. krusei</i> ATCC 6258   | <i>C. sempervirens</i> | <i>M. alternifolia</i> | 2000 | 4000  | 1000 | 1000  | 0,75   | Additive     |

|                                   |                        |                        |      |      |      |       |        |              |
|-----------------------------------|------------------------|------------------------|------|------|------|-------|--------|--------------|
| <i>C. krusei</i> ATCC 6258        | <i>M. alternifolia</i> | Clotrimazole           | 4000 | 0,5  | 2000 | 0,125 | 0,75   | Additive     |
| <i>C. krusei</i> ATCC 6258        | <i>C. limon</i>        | Clotrimazole           | 4000 | 0,5  | 4000 | 2     | 5      | Antagonism   |
| <i>C. krusei</i> ATCC 6258        | <i>L. cubeba</i>       | <i>M. alternifolia</i> | 1000 | 4000 | 2000 | 250   | 2,0625 | Indifference |
| <i>C. krusei</i> ATCC 6258        | <i>C. sempervirens</i> | Clotrimazole           | 2000 | 0,5  | 2000 | 0,125 | 1,25   | Indifference |
| <i>C. krusei</i> ATCC 6258        | <i>L. cubeba</i>       | <i>C. limon</i>        | 1000 | 0,5  | 2000 | 0,25  | 2,5    | Indifference |
| <i>C. krusei</i> ATCC 6258        | <i>L. cubeba</i>       | Clotrimazole           | 1000 | 0,5  | 2000 | 0,25  | 2,5    | Indifference |
| <i>C. krusei</i> ATCC 6258        | <i>C. sempervirens</i> | <i>C. limon</i>        | 4000 | 4000 | 1000 | 250   | 0,3125 | Synergism    |
| <i>C. krusei</i> ATCC 6258        | <i>C. limon</i>        | <i>M. alternifolia</i> | 4000 | 4000 | 1000 | 1000  | 0,5    | Synergism    |
| <i>C. krusei</i> SV 03            | <i>C. sempervirens</i> | Clotrimazole           | 500  | 0,5  | 2000 | 0,125 | 4,25   | Antagonism   |
| <i>C. krusei</i> SV 03            | <i>C. limon</i>        | Clotrimazole           | 1000 | 0,5  | 4000 | 2     | 8      | Antagonism   |
| <i>C. krusei</i> SV 03            | <i>C. sempervirens</i> | <i>C. limon</i>        | 500  | 1000 | 1000 | 1000  | 3      | Indifference |
| <i>C. krusei</i> SV 03            | <i>C. sempervirens</i> | <i>L. cubeba</i>       | 500  | 500  | 500  | 250   | 1,5    | Indifference |
| <i>C. krusei</i> SV 03            | <i>C. sempervirens</i> | <i>M. alternifolia</i> | 500  | 2000 | 1000 | 250   | 2,125  | Indifference |
| <i>C. krusei</i> SV 03            | <i>L. cubeba</i>       | <i>C. limon</i>        | 500  | 1000 | 1000 | 250   | 2,25   | Indifference |
| <i>C. krusei</i> SV 03            | <i>L. cubeba</i>       | <i>M. alternifolia</i> | 500  | 2000 | 1000 | 250   | 2,125  | Indifference |
| <i>C. krusei</i> SV 03            | <i>C. limon</i>        | <i>M. alternifolia</i> | 1000 | 2000 | 2000 | 2000  | 3      | Indifference |
| <i>C. krusei</i> SV 03            | <i>L. cubeba</i>       | Clotrimazole           | 500  | 0,5  | 500  | 0,5   | 2      | Indifference |
| <i>C. krusei</i> SV 03            | <i>M. alternifolia</i> | Clotrimazole           | 2000 | 0,5  | 2000 | 0,125 | 1,25   | Indifference |
| <i>C. parapsilosis</i> ATCC 22019 | <i>L. cubeba</i>       | <i>M. alternifolia</i> | 1000 | 4000 | 500  | 2000  | 1      | Additive     |
| <i>C. parapsilosis</i> ATCC 22019 | <i>C. sempervirens</i> | <i>C. limon</i>        | 4000 | 1000 | 4000 | 4000  | 5      | Antagonism   |
| <i>C. parapsilosis</i> ATCC 22019 | <i>C. limon</i>        | <i>M. alternifolia</i> | 1000 | 4000 | 4000 | 4000  | 5      | Antagonism   |
| <i>C. parapsilosis</i> ATCC 22019 | <i>L. cubeba</i>       | Clotrimazole           | 1000 | 0,25 | 4000 | 1     | 8      | Antagonism   |
| <i>C. parapsilosis</i> ATCC 22019 | <i>C. sempervirens</i> | <i>L. cubeba</i>       | 4000 | 1000 | 1000 | 1000  | 1,25   | Indifference |
| <i>C. parapsilosis</i> ATCC 22019 | <i>C. sempervirens</i> | <i>M. alternifolia</i> | 4000 | 4000 | 4000 | 4000  | 2      | Indifference |
| <i>C. parapsilosis</i> ATCC 22019 | <i>L. cubeba</i>       | <i>C. limon</i>        | 1000 | 1000 | 1000 | 1000  | 2      | Indifference |
| <i>C. parapsilosis</i> ATCC 22019 | <i>C. sempervirens</i> | Clotrimazole           | 4000 | 0,25 | 250  | 0,5   | 2,0625 | Indifference |
| <i>C. parapsilosis</i> ATCC 22019 | <i>M. alternifolia</i> | Clotrimazole           | 4000 | 0,25 | 250  | 0,25  | 1,0625 | Indifference |
| <i>C. parapsilosis</i> ATCC 22019 | <i>C. limon</i>        | Clotrimazole           | 1000 | 0,25 | 1000 | 0,125 | 1,5    | Indifference |

|                               |                        |                        |      |       |      |       |        |              |
|-------------------------------|------------------------|------------------------|------|-------|------|-------|--------|--------------|
| <i>C. parapsilosis</i> SV 04  | <i>C. sempervirens</i> | <i>C. limon</i>        | 4000 | 4000  | 2000 | 250   | 0,5625 | Additive     |
| <i>C. parapsilosis</i> SV 04  | <i>C. sempervirens</i> | <i>L. cubeba</i>       | 4000 | 2000  | 1000 | 1000  | 0,75   | Additive     |
| <i>C. parapsilosis</i> SV 04  | <i>C. sempervirens</i> | <i>M. alternifolia</i> | 4000 | 4000  | 2000 | 250   | 0,5625 | Additive     |
| <i>C. parapsilosis</i> SV 04  | <i>L. cubeba</i>       | <i>C. limon</i>        | 2000 | 4000  | 2000 | 2000  | 1,5    | Indifference |
| <i>C. parapsilosis</i> SV 04  | <i>L. cubeba</i>       | <i>M. alternifolia</i> | 2000 | 4000  | 2000 | 250   | 1,0625 | Indifference |
| <i>C. parapsilosis</i> SV 04  | <i>C. limon</i>        | <i>M. alternifolia</i> | 4000 | 4000  | 4000 | 4000  | 2      | Indifference |
| <i>C. parapsilosis</i> SV 04  | <i>L. cubeba</i>       | Clotrimazole           | 2000 | 0,125 | 2000 | 0,25  | 3      | Indifference |
| <i>C. parapsilosis</i> SV 04  | <i>C. sempervirens</i> | Clotrimazole           | 4000 | 0,125 | 250  | 0,032 | 0,3185 | Synergism    |
| <i>C. parapsilosis</i> SV 110 | <i>C. limon</i>        | Clotrimazole           | 4000 | 0,125 | 2000 | 0,125 | 1,5    | Indifference |
| <i>C. parapsilosis</i> SV 110 | <i>M. alternifolia</i> | Clotrimazole           | 4000 | 0,125 | 2000 | 0,125 | 1,5    | Indifference |

MIC: µg/mL (able to reduce by ≥90% optical density (OD) compared to control free of EO and clotrimazole). \*Isolated MIC: Only 1 substance (EO or clotrimazole). \*\* MIC Combined: MIC of the combination (EO-EO or EO-clotrimazole). FICI: fractional inhibitory concentration index.
